# Supplementary material for: PtCu–O highly excavated octahedral nanostructures built with nanodendrites for superior alcohol electrooxidation
Source: Royal Society of Chemistry journal article supplement (doi:10.1039/c9ta01236b), 2019-01-01
Supplement: c9ta01236b1.pdf [file c9ta01236b1.pdf]

## Electronic Supplementary Material

### Highly Excavated Octahedral PtCu-O Alloy Nanostructures Built with Nanodendrites for Superior Alcohol Electrooxidation

Fengxia Wu,<sup>a,b</sup> Ling Zhang,<sup>c</sup> Jianping Lai,<sup>a</sup> Wenxin Niu,<sup>\*,a,b</sup> Rafael Luque,<sup>\*,d,e</sup> Guobao Xu<sup>\*,a,b</sup>

<sup>a</sup> State Key Laboratory of Electroanalytical Chemistry, Changchun Institute of Applied Chemistry, Chinese Academy of Sciences, Changchun 130022, China

<sup>b</sup> University of Science and Technology of China, Hefei, China

<sup>c</sup> School of Science, Harbin Institute of Technology (HIT), Shenzhen, HIT Campus of University Town of Shenzhen, Shenzhen 518055, China

<sup>d</sup> Departamento de Química Orgánica, Universidad de Córdoba Campus de Rabanales, Edificio Marie Curie (C-3), Km 396, Córdoba, Spain

<sup>e</sup> Peoples Friendship University of Russia (RUDN University), 6 Miklukho Maklaya Str., 117198, Moscow, Russia

\*Email - q62alsor@uco.es

Calculation of ECSA

The loading amounts of Pt for the PtCu-O EOND nanostructures and commercial Pt/C were all kept at 1.5 μg, as calculated by ICP-AES measurement. For the CV at room temperature in 0.5 M KOH solution, the equation for the calculation of electrochemically active surface area (ECSA) is shown as follows:

$$ECSA(m^2/g) = \frac{Q_H(C)}{210\mu C/cm^2 * m_{Pt}(mg) * V(v/s)} * 10^5$$

where  $Q_H$  (C) is the hydrogen desorption charge calculated from the CV.  $210 \mu C/cm^2$  is used as the conversion factor.  $m_{Pt}$  is the working electrode Pt loading.  $V$  is the scan rate (0.05 V/s). The calculated ECSA of Pt/C is  $33.4 m^2/g$ , which is similar to that in alkaline media in reported literatures.<sup>1,2</sup> ECSA of PtCu-O EOND nanostructures ( $29.3 m^2/g$ ) is smaller than that of Pt/C, which is attributed to the prevention of hydrogen adsorption/desorption by oxidative Cu of PtCu-O EOND nanostructures.

Thus we further conduct CO-stripping experiment to calculate ECSA of the catalysts. The equation for the calculation of ECSA is shown as follows:

$$ECSA(m^2/g) = \frac{Q_{CO}(C)}{420\mu C/cm^2 * m_{Pt}(mg) * V(v/s)} * 10^5$$

Where  $Q_{CO}$  (C) is CO adsorption charge calculated from the CV.  $420 \mu C/cm^2$  is used as the conversion factor.  $m_{Pt}$  is Pt loading of the working electrode.  $V$  is the scan rate (0.05 V/s). The calculated ECSA of Pt/C is  $43.6 m^2/g$ . The ECSA of PtCu-O EOND nanostructures is  $75.5 m^2/g$ . The large difference of calculated ECSAs of EOND nanostructures between  $Q_H$  and  $Q_{CO}$  could be result from oxidative Cu surface of EOND nanostructures. To consistent with previously reported literature, we adopt the ECSA calculated from hydrogen desorption charge to calculate specific activity.

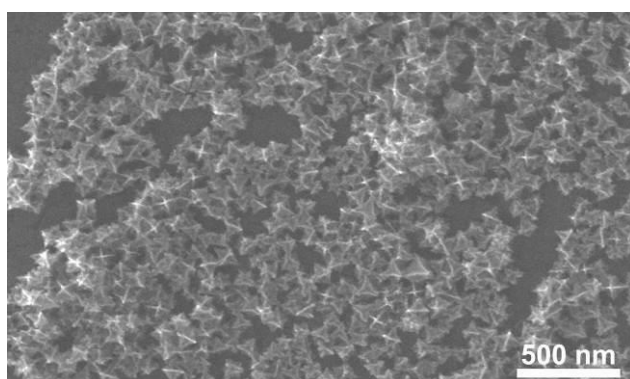

**Figure S1.** Low-magnification SEM image of PtCu-O EOND nanostructures.

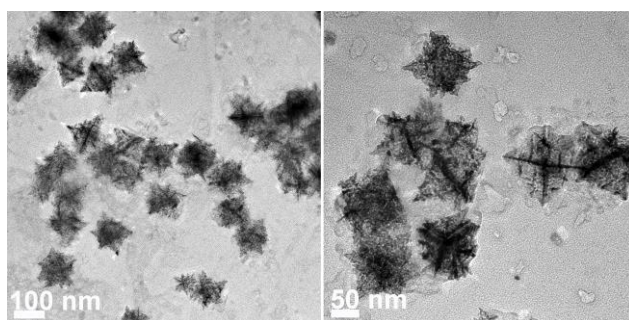

**Figure S2.** Low-magnification TEM image of PtCu-O EOND nanostructures.

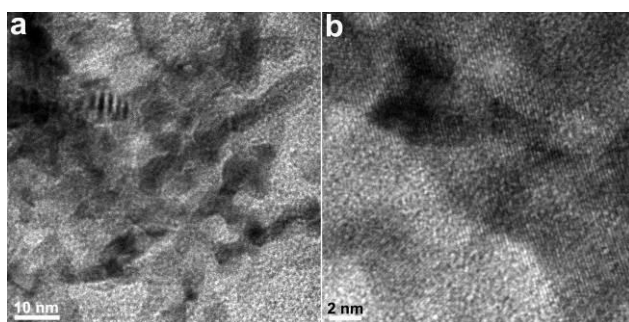

**Figure S3.** HRTEM images of the nanodendrites of PtCu-O EOND nanostructures.

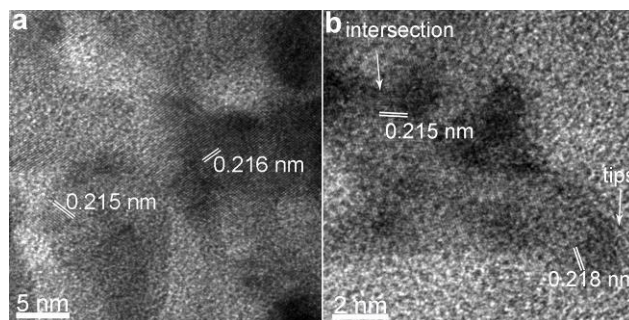

**Figure S4.** HRTEM images of the PtCu-O EOND nanostructures.

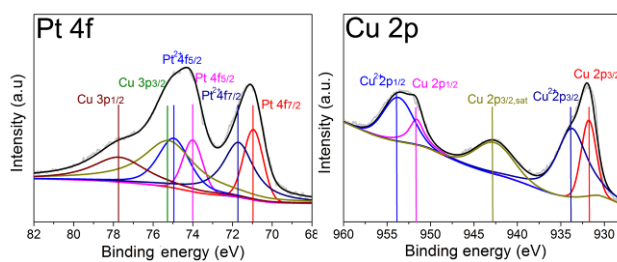

**Figure S5.** XPS spectra of the PtCu-O EOND nanostructures.

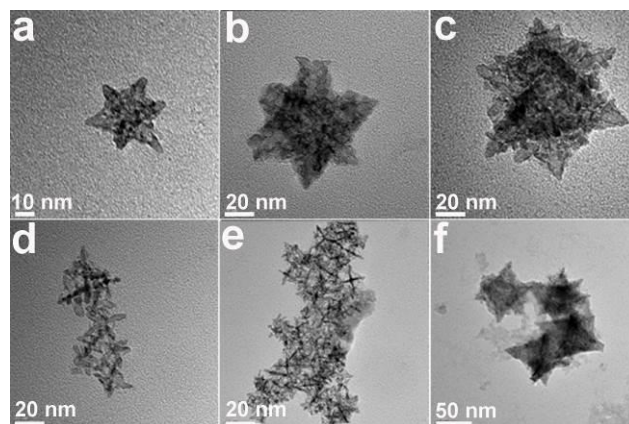

**Figure S6.** TEM images of the PtCu-O nanostructures formed after different reaction times. a, d) 2 h, b, e) 2.5 h, and c, f) 3 h.

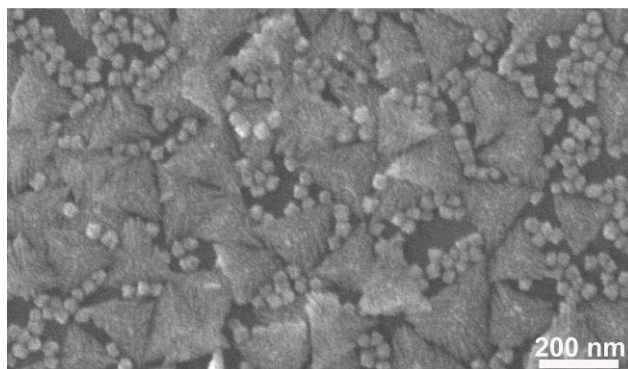

**Figure S7.** SEM image of PtCu-O nanostructures obtained without the addition of ethanolamine in the synthesis while keeping the other parameters constant.

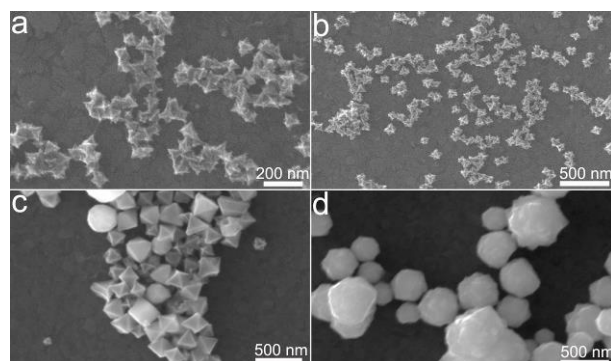

**Figure S8.** SEM image of PtCu-O nanostructures obtained with different amount of ethanolamine in the synthesis while keeping the other parameters constant. a) 0.3 ml b) 0.5 ml c) 0.7 ml d) 0.9 ml.

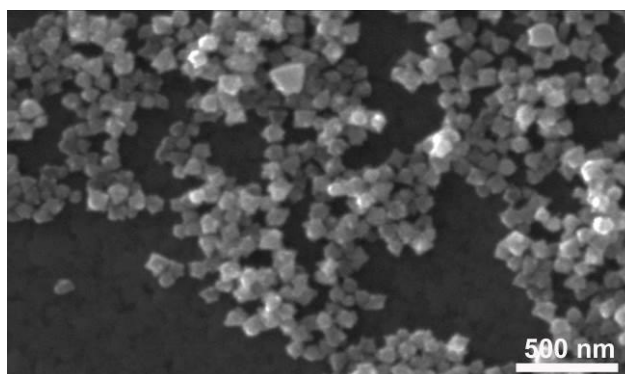

**Figure S9.** SEM image of PtCu-O nanostructures obtained without the addition of acetamide in the synthesis while keeping the other parameters constant.

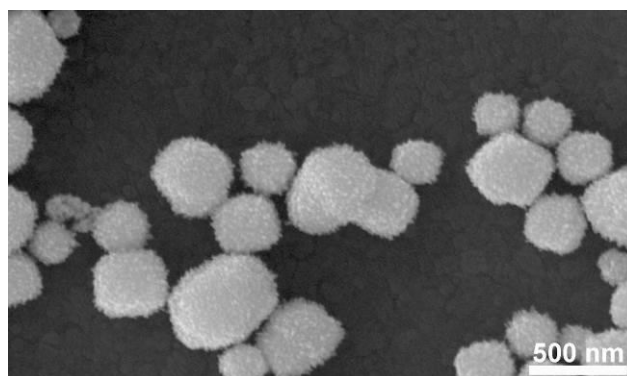

**Figure S10.** SEM image of Pt nanoparticles obtained without the addition of  $\text{CuCl}_2$  in the synthesis while keeping the other parameters constant.

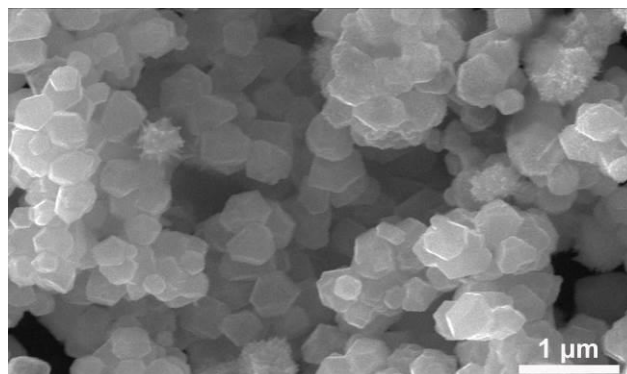

**Figure S11.** SEM image of PtCu-O nanostructures obtained without the addition of KI in the synthesis while keeping the other parameters constant.

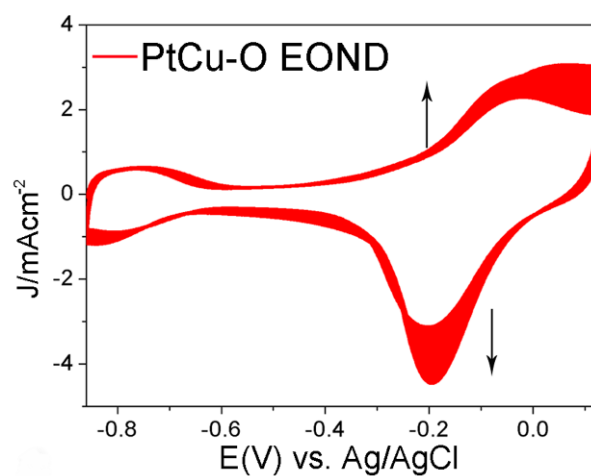

**Figure S12.** Activated CV curves of PtCu-O EOND nanostructures in 0.5 M KOH solution for 100 cycles.

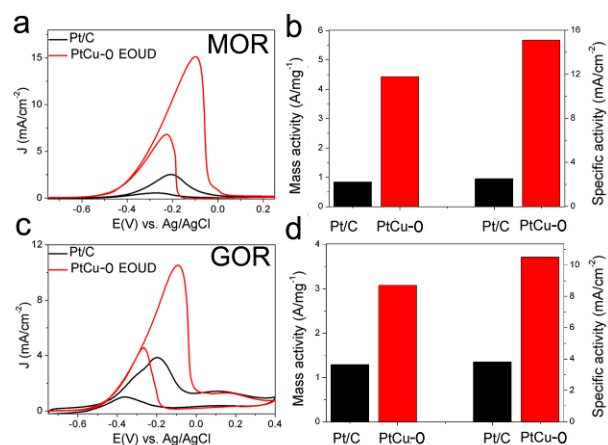

**Figure S13.** Specific activity and mass activity of commercial Pt/C and PtCu-O EOODs for methanol (a, b) and glycerol (c, d) at a scan rate of 50 mV s<sup>-1</sup>.

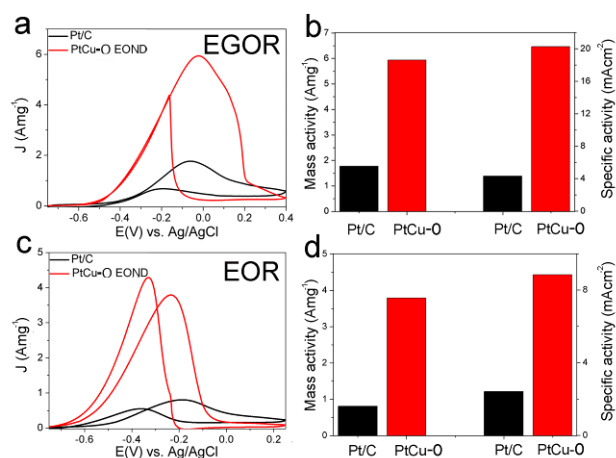

**Figure S14.** Specific activity and mass activity of commercial Pt/C and PtCu-O EOODs for ethylene glycol (EGOR) (a, b) and ethanol (EOR) (c, d) at a scan rate of 50 mV s<sup>-1</sup>.

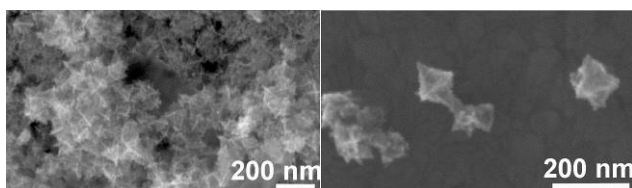

**Figure S15.** SEM images of PtCu-O nanostructures after catalytic operation.

**Table S1.** MOR activities of the recently reported catalysts

| Catalysts                                      | Jm                        | Electrolyte                | References                                |
|------------------------------------------------|---------------------------|----------------------------|-------------------------------------------|
| PtCu-O EOND                                    | 4.43A/mg                  | 0.5 M KOH + 1 M methanol   | <b>This work</b>                          |
| Pt/Ni(OH) <sub>2</sub> /rGO<br>ternary hybrids | 1.07 A/mg                 | 1 M KOH + 1 M methanol     | Nat. Commun. <b>2015</b> , 6, 10035       |
| PtNi/C                                         | 1.2A/mg                   | 1 M NaOH + 1 M methanol    | Catal. Commun. <b>2010</b> , 12, 67       |
| Popcorn-like PtAu                              | 0.6A/mg                   | 1 M KOH + 1 M methanol     | J. Mater. Chem. A <b>2014</b> , 2, 8386   |
| PtAu/RGO/GC                                    | 1.6 A/mg <sub>Pt+Au</sub> | 1 M KOH + 1 M methanol     | J. Mater. Chem. A <b>2013</b> , 1, 7255   |
| Pt <sub>m</sub> Ag                             | 3A/mg                     | 0.5 M KOH + 1 M methanol   | J. Catal. <b>2012</b> , 290, 18           |
| Pt <sub>1</sub> Ni <sub>1</sub> /C             | 1.75A/mg                  | 1 M KOH + 1 M methanol     | Nano Res. <b>2018</b> , 11, 2058          |
| Pt <sub>3.5</sub> Pb nerve<br>nanowires        | 2.84A/mg                  | 0.5 M KOH + 1 M methanol   | Nanoscale <b>2017</b> , 9, 201            |
| PtAg popcorns                                  | 1.65A/mg                  | 1 M KOH + 1 M methanol     | ACS Nano <b>2012</b> , 6, 7397            |
| PtCu nanoframes                                | 2.26A/mg                  | 0.5 M KOH + 1 M methanol   | Adv. Mater. <b>2016</b> , 28, 8712        |
| PdAgRhPt<br>nanoframes                         | 2.33A/mg                  | 1 M KOH + 1 M methanol     | Small <b>2016</b> , 12, 5261              |
| PtZn/MWNT                                      | 0.55A/mg                  | 0.1 M KOH + 0.5 M methanol | J. Am. Chem. Soc. <b>2017</b> , 139, 4762 |

**Table S2.** GOR activities of the recently reported catalysts

| Catalysts                                                      | Jm                        | Electrolyte                 | References                                         |
|----------------------------------------------------------------|---------------------------|-----------------------------|----------------------------------------------------|
| PtCu-O EOND                                                    | 3.08A/mg                  | 1 M KOH + 0.1 M glycerol    | <b>This work</b>                                   |
| Pd <sub>55</sub> Pt <sub>30</sub> nanowire networks            | 1.8 A/mg                  | 1 M KOH + 0.1 M glycerol    | Energy Environ. Sci. <b>2015</b> , 8,2910          |
| Pd <sub>4</sub> Bi catalysts                                   | 0.75A/mg                  | 1 M KOH + 0.1 M glycerol    | J. Am. Chem. Soc. <b>2014</b> , 136, 3937          |
| Pd nanosheet                                                   | 1.5A/mg                   | 0.5 M NaOH + 0.5 M glycerol | ACS Appl. Mater. Interfaces <b>2016</b> , 8, 20642 |
| Pd <sub>62</sub> Au <sub>21</sub> Ni <sub>17</sub> nanosponges | 3.3 A/mg <sub>Pt+Au</sub> | 1 M KOH + 0.1 M glycerol    | Energy Environ. Sci. <b>2017</b> , 9,3097          |
| Pd-CNx/G                                                       | 1.1A/mg                   | 0.5 M NaOH + 0.5 M glycerol | ACS Catal. <b>2015</b> , 5, 3174                   |
| Au <sub>1</sub> Cu <sub>1</sub> triangular nanoprisms          | 2.26A/mg                  | 1 M KOH + 1 M glycerol      | J. Mater. Chem. A <b>2017</b> , 5, 15932           |
| PdSn <sub>3</sub> catalysts                                    | 1.1A/mg                   | 1 M KOH + 0.1 M glycerol    | Appl. Catal. B: Environ. <b>2015</b> , 176, 429    |
| ultrafine Pt <sub>3</sub> Fe nanowires                         | 2A/mg                     | 1 M KOH + 1 M glycerol      | Nanoscale <b>2018</b> , DOI: 10.1039/c8nr04918a    |
| PtAg/C                                                         | 1.1A/mg                   | 1 M KOH + 1 M glycerol      | Green Chem. <b>2016</b> , 18,386                   |

**References**

1. W. Huang, H. Wang, J. Zhou, J. Wang, P. N. Duchesne, D. Muir, P. Zhang, N. Han, F. Zhao, M. Zeng, J. Zhong, C. Jin, Y. Li, S. T. Lee and H. Dai, Nat. Commun. 2015, **6**, 10035.
2. Z. Zhang, Z. Luo, B. Chen, C. Wei, J. Zhao, J. Chen, X. Zhang, Z. Lai, Z. Fan, C. Tan, M. Zhao, Q. Lu, B. Li, Y. Zong, C. Yan, G. Wang, Z. J. Xu and H. Zhang, Adv. Mater. 2016, **28**, 8712.
